# Supplementary material for: The effect of nanoclay on the rheology and dynamics of polychlorinated biphenyl
Source: Royal Society of Chemistry journal article supplement (doi:10.1039/c5sm02054a), 2015-01-01
Supplement: c5sm02054a1.pdf [file c5sm02054a1.pdf]

SUPPLEMENTARY MATERIAL

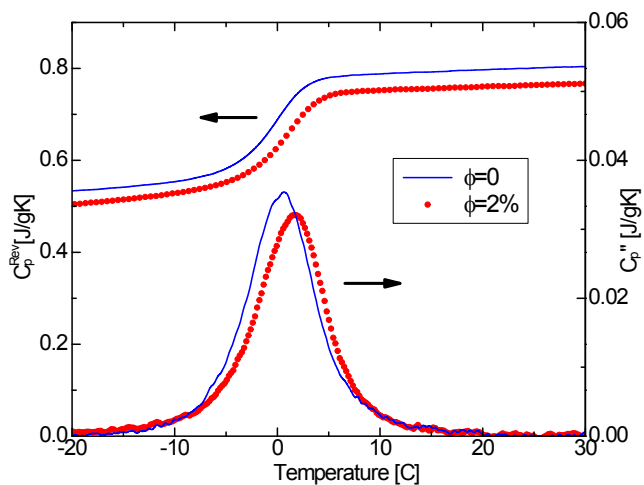

**Figure.** Reversible and imaginary components of MDSC for PCB with  $\phi=0$  (line) and 1.8% nanoclay (circles).

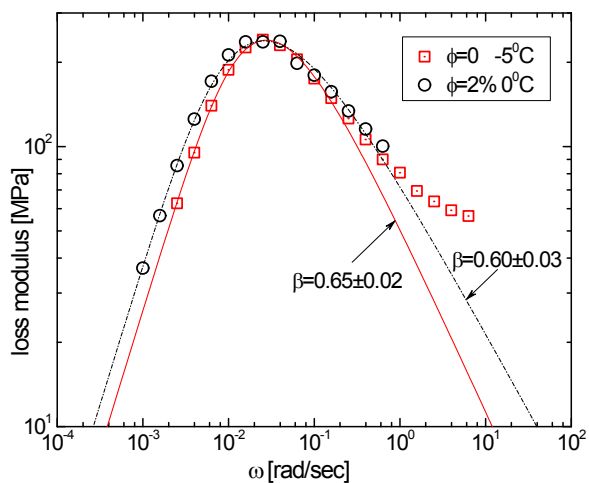

**Figure.** Dynamic shear modulus for the PCB neat (squares) and with 2% nanoclay (circles). The ordinate values for the composite were shifted to coincide with the neat PCB at the peak maximum.

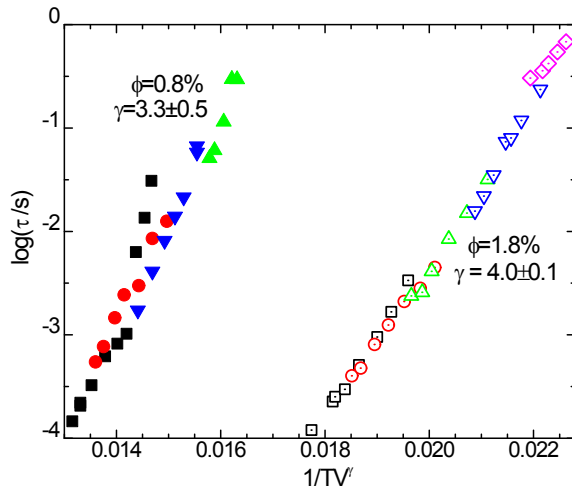

**Figure.** Scaling plots of the  $\alpha'$  peak in the dielectric spectra of PCB  $\phi=0.8$  (filled symbols) and 1.8% (dotted open symbols). The quality of the scaling is inferior to that of the primary  $\alpha$  relaxation, and the exponent is smaller, reflecting the weaker pressure dependence.
